# Supplementary material for: The kinetics and mechanism of an aqueous phase isoprene reaction with hydroxyl radical
Source: Copernicus journal article supplement (doi:10.5194/acp-11-7399-2011), 2011-08-01
Supplement: Supplementary file 1 [file acp-11-7399-2011-supplement.pdf]

# The kinetics and mechanism of an aqueous phase isoprene reaction with hydroxy radical

D. Huang, X. Zhang, Z. M. Chen\*, Y. Zhao and X. L. Shen

State Key Laboratory of Environmental Simulation and Pollution Control,

College of Environmental Sciences and Engineering, Peking University, Beijing 100871, China

## Supplementary material

**Table S1.** Mechanisms for the OH oxidation of isoprene in the box model.

**Fig. S1.** Time series of products in the aqueous isoprene-OH reaction under the condition of 1.5 L top space in the 2.1 L reactor.

**Fig.S2.** Experiments 1 and 2 (green and blue) for the kinetics of aqueous OH-initiated oxidation of isoprene (ISO), methacrolein (MACR), and methyl vinyl ketone (MVK) relative to salicylic acid at 283 K. (a) ISO/SA; (b) MACR/SA; (c) MVK/SA.

---

\* Correspondence to: Z.M. Chen  
(zmchen@pku.edu.cn)

**Table S1.** Mechanisms for the OH oxidation of isoprene in the box model.

| NO | Reaction                                                                                                | Initial<br>Rate<br>constant<br>(M <sup>-1</sup> s <sup>-1</sup> ) | Adjusted<br>Rate<br>constant<br>(M <sup>-1</sup> s <sup>-1</sup> ) |
|----|---------------------------------------------------------------------------------------------------------|-------------------------------------------------------------------|--------------------------------------------------------------------|
| 1  | $\text{H}_2\text{O}_2 + h\nu \rightarrow 2 \cdot\text{OH}$                                              | $2.2 \times 10^{-5}$<br>(s <sup>-1</sup> )                        | $2.2 \times 10^{-5}$<br>(s <sup>-1</sup> )                         |
| 2  | $\text{H}_2\text{O}_2 + \cdot\text{OH} \rightarrow \text{HO}_2 \cdot + \text{H}_2\text{O}$              | $2.7 \times 10^7$                                                 | $2.7 \times 10^7$                                                  |
| 3  | $\text{HO}_2 \cdot + \text{H}_2\text{O}_2 \rightarrow \text{H}_2\text{O} + \text{O}_2 + \cdot\text{OH}$ | 3.7                                                               | 3.7                                                                |
| 4  | $\text{HO}_2 \cdot + \text{HO}_2 \cdot \rightarrow \text{H}_2\text{O}_2 + \text{O}_2$                   | $8.3 \times 10^5$                                                 | $8.3 \times 10^5$                                                  |
| 5  | isoprene + $\cdot\text{OH} \rightarrow \text{R1O}_2$                                                    | $1.8 \times 10^9$                                                 | $1.8 \times 10^9$                                                  |
| 6  | isoprene + $\cdot\text{OH} \rightarrow \text{R2O}_2$                                                    | $5.4 \times 10^9$                                                 | $5.4 \times 10^9$                                                  |
| 7  | isoprene + $\cdot\text{OH} \rightarrow \text{R3O}_2$                                                    | $6.0 \times 10^8$                                                 | $6.0 \times 10^8$                                                  |
| 8  | isoprene + $\cdot\text{OH} \rightarrow \text{R4O}_2$                                                    | $6.0 \times 10^8$                                                 | $6.0 \times 10^8$                                                  |
| 9  | isoprene + $\cdot\text{OH} \rightarrow \text{R5O}_2$                                                    | $9.6 \times 10^8$                                                 | $9.6 \times 10^8$                                                  |

|    |                                                                                |                   |                   |
|----|--------------------------------------------------------------------------------|-------------------|-------------------|
| 10 | isoprene + $\cdot\text{OH} \rightarrow \text{R6O}_2$                           | $2.6 \times 10^9$ | $2.6 \times 10^9$ |
| 11 | $\text{R1O}_2 + \text{R1O}_2 \rightarrow \text{R1O} + \text{R1O} + \text{O}_2$ | $1.4 \times 10^8$ | $1.4 \times 10^8$ |
| 12 | $\text{R2O}_2 + \text{R2O}_2 \rightarrow \text{R2O} + \text{R2O} + \text{O}_2$ | $4.2 \times 10^6$ | $4.2 \times 10^8$ |
| 13 | $\text{R3O}_2 + \text{R3O}_2 \rightarrow \text{R3O} + \text{R3O} + \text{O}_2$ | $1.7 \times 10^8$ | $1.7 \times 10^8$ |
| 14 | $\text{R4O}_2 + \text{R4O}_2 \rightarrow \text{R4O} + \text{R4O} + \text{O}_2$ | $1.7 \times 10^8$ | $1.7 \times 10^8$ |
| 15 | $\text{R5O}_2 + \text{R5O}_2 \rightarrow \text{R5O} + \text{R5O} + \text{O}_2$ | $1.0 \times 10^8$ | $1.0 \times 10^8$ |
| 16 | $\text{R6O}_2 + \text{R6O}_2 \rightarrow \text{R6O} + \text{R6O} + \text{O}_2$ | $2.8 \times 10^8$ | $2.8 \times 10^8$ |
| 17 | $\text{R1O}_2 + \text{R2O}_2 \rightarrow \text{R1O} + \text{R2O} + \text{O}_2$ | $1.2 \times 10^8$ | $2.0 \times 10^8$ |
| 18 | $\text{R1O}_2 + \text{R3O}_2 \rightarrow \text{R1O} + \text{R3O} + \text{O}_2$ | $1.7 \times 10^8$ | $1.7 \times 10^8$ |
| 19 | $\text{R1O}_2 + \text{R4O}_2 \rightarrow \text{R1O} + \text{R4O} + \text{O}_2$ | $1.7 \times 10^8$ | $1.7 \times 10^8$ |
| 20 | $\text{R1O}_2 + \text{R5O}_2 \rightarrow \text{R1O} + \text{R5O} + \text{O}_2$ | $1.2 \times 10^8$ | $1.2 \times 10^8$ |
| 21 | $\text{R1O}_2 + \text{R6O}_2 \rightarrow \text{R1O} + \text{R6O} + \text{O}_2$ | $1.7 \times 10^8$ | $1.7 \times 10^8$ |
| 22 | $\text{R2O}_2 + \text{R3O}_2 \rightarrow \text{R2O} + \text{R3O} + \text{O}_2$ | $1.2 \times 10^8$ | $2.2 \times 10^8$ |

|    |                                                                              |                   |                   |
|----|------------------------------------------------------------------------------|-------------------|-------------------|
| 23 | $R2O_2 + R4O_2 \rightarrow R2O + R4O + O_2$                                  | $1.2 \times 10^8$ | $2.2 \times 10^8$ |
| 24 | $R2O_2 + R5O_2 \rightarrow R2O + R5O + O_2$                                  | $1.2 \times 10^8$ | $2.2 \times 10^8$ |
| 25 | $R2O_2 + R6O_2 \rightarrow R2O + R6O + O_2$                                  | $1.7 \times 10^8$ | $2.6 \times 10^8$ |
| 26 | $R3O_2 + R4O_2 \rightarrow R3O + R4O + O_2$                                  | $1.7 \times 10^8$ | $1.7 \times 10^8$ |
| 27 | $R3O_2 + R5O_2 \rightarrow R3O + R5O + O_2$                                  | $1.3 \times 10^8$ | $1.3 \times 10^8$ |
| 28 | $R3O_2 + R6O_2 \rightarrow R3O + R6O + O_2$                                  | $2.2 \times 10^8$ | $2.2 \times 10^8$ |
| 29 | $R4O_2 + R5O_2 \rightarrow R4O + R5O + O_2$                                  | $1.3 \times 10^8$ | $1.3 \times 10^8$ |
| 30 | $R4O_2 + R6O_2 \rightarrow R4O + R6O + O_2$                                  | $2.2 \times 10^8$ | $2.2 \times 10^8$ |
| 31 | $R5O_2 + R6O_2 \rightarrow R5O + R6O + O_2$                                  | $1.7 \times 10^8$ | $1.7 \times 10^8$ |
| 32 | $R1O_2 + R1O_2 \rightarrow C_5 \text{ alcohol} + C_5 \text{ carbonyl} + O_2$ | $9.2 \times 10^7$ | $9.2 \times 10^7$ |
| 33 | $R3O_2 + R3O_2 \rightarrow C_5 \text{ alcohol} + C_5 \text{ carbonyl} + O_2$ | $1.2 \times 10^8$ | $1.2 \times 10^8$ |
| 34 | $R4O_2 + R4O_2 \rightarrow C_5 \text{ alcohol} + C_5 \text{ carbonyl} + O_2$ | $1.2 \times 10^8$ | $1.2 \times 10^8$ |
| 35 | $R5O_2 + R5O_2 \rightarrow C_5 \text{ alcohol} + C_5 \text{ carbonyl} + O_2$ | $6.5 \times 10^7$ | $6.5 \times 10^7$ |

|    |                                                                              |                   |                   |
|----|------------------------------------------------------------------------------|-------------------|-------------------|
| 36 | $R6O_2 + R6O_2 \rightarrow C_5 \text{ alcohol} + C_5 \text{ carbonyl} + O_2$ | $6.9 \times 10^7$ | $6.9 \times 10^7$ |
| 37 | $R1O_2 + R2O_2 \rightarrow C_5 \text{ alcohol} + C_5 \text{ carbonyl} + O_2$ | $2.9 \times 10^7$ | $4.0 \times 10^7$ |
| 38 | $R1O_2 + R3O_2 \rightarrow C_5 \text{ alcohol} + C_5 \text{ carbonyl} + O_2$ | $1.1 \times 10^8$ | $1.1 \times 10^8$ |
| 39 | $R1O_2 + R4O_2 \rightarrow C_5 \text{ alcohol} + C_5 \text{ carbonyl} + O_2$ | $1.1 \times 10^8$ | $1.1 \times 10^8$ |
| 40 | $R1O_2 + R5O_2 \rightarrow C_5 \text{ alcohol} + C_5 \text{ carbonyl} + O_2$ | $7.7 \times 10^7$ | $7.7 \times 10^7$ |
| 41 | $R1O_2 + R6O_2 \rightarrow C_5 \text{ alcohol} + C_5 \text{ carbonyl} + O_2$ | $7.0 \times 10^7$ | $7.0 \times 10^7$ |
| 42 | $R2O_2 + R3O_2 \rightarrow C_5 \text{ alcohol} + C_5 \text{ carbonyl} + O_2$ | $3.1 \times 10^7$ | $5.7 \times 10^7$ |
| 43 | $R2O_2 + R4O_2 \rightarrow C_5 \text{ alcohol} + C_5 \text{ carbonyl} + O_2$ | $3.1 \times 10^7$ | $5.7 \times 10^7$ |
| 44 | $R2O_2 + R5O_2 \rightarrow C_5 \text{ alcohol} + C_5 \text{ carbonyl} + O_2$ | $2.9 \times 10^7$ | $5.3 \times 10^7$ |
| 45 | $R2O_2 + R6O_2 \rightarrow C_5 \text{ alcohol} + C_5 \text{ carbonyl} + O_2$ | $1.9 \times 10^7$ | $3.5 \times 10^7$ |
| 46 | $R3O_2 + R4O_2 \rightarrow C_5 \text{ alcohol} + C_5 \text{ carbonyl} + O_2$ | $1.2 \times 10^8$ | $1.2 \times 10^8$ |
| 47 | $R3O_2 + R5O_2 \rightarrow C_5 \text{ alcohol} + C_5 \text{ carbonyl} + O_2$ | $8.7 \times 10^7$ | $8.7 \times 10^7$ |
| 48 | $R3O_2 + R6O_2 \rightarrow C_5 \text{ alcohol} + C_5 \text{ carbonyl} + O_2$ | $9.3 \times 10^7$ | $9.3 \times 10^7$ |

|    |                                                                                    |                   |                   |
|----|------------------------------------------------------------------------------------|-------------------|-------------------|
| 49 | $R4O_2 + R5O_2 \rightarrow C_5 \text{ alcohol} + C_5 \text{ carbonyl} + O_2$       | $8.7 \times 10^7$ | $8.7 \times 10^7$ |
| 50 | $R4O_2 + R6O_2 \rightarrow C_5 \text{ alcohol} + C_5 \text{ carbonyl} + O_2$       | $9.3 \times 10^7$ | $9.3 \times 10^7$ |
| 51 | $R5O_2 + R6O_2 \rightarrow C_5 \text{ alcohol} + C_5 \text{ carbonyl} + O_2$       | $7.0 \times 10^7$ | $7.0 \times 10^7$ |
| 52 | $R1O_2 + HO_2 \rightarrow R1OOH + O_2$                                             | $9.8 \times 10^8$ | $9.8 \times 10^8$ |
| 53 | $R2O_2 + HO_2 \rightarrow R2OOH + O_2$                                             | $9.8 \times 10^8$ | $9.8 \times 10^8$ |
| 54 | $R3O_2 + HO_2 \rightarrow R3OOH + O_2$                                             | $9.8 \times 10^8$ | $9.8 \times 10^8$ |
| 55 | $R4O_2 + HO_2 \rightarrow R4OOH + O_2$                                             | $9.8 \times 10^8$ | $9.8 \times 10^8$ |
| 56 | $R5O_2 + HO_2 \rightarrow R5OOH + O_2$                                             | $9.8 \times 10^8$ | $9.8 \times 10^8$ |
| 57 | $R6O_2 + HO_2 \rightarrow R6OOH + O_2$                                             | $9.8 \times 10^8$ | $9.8 \times 10^8$ |
| 58 | $MVKAOO + R1O_2 \rightarrow 0.3 * MACR + 0.3 * MVK + 0.6 * MG + HCHO + 1.2 * HO_2$ | $3.0 \times 10^6$ | $3.0 \times 10^6$ |
| 59 | $MVKAOO + R2O_2 \rightarrow 0.3 * MACR + 0.3 * MVK + 0.6 * MG + HCHO + 1.2 * HO_2$ | $3.0 \times 10^6$ | $3.0 \times 10^6$ |
| 60 | $MVKAOO + R3O_2 \rightarrow 0.3 * MACR + 0.3 * MVK + 0.6 * MG + HCHO + 1.2 * HO_2$ | $3.0 \times 10^6$ | $3.0 \times 10^6$ |
| 61 | $MVKAOO + R4O_2 \rightarrow 0.3 * MACR + 0.3 * MVK + 0.6 * MG + HCHO + 1.2 * HO_2$ | $3.0 \times 10^6$ | $3.0 \times 10^6$ |

|    |                                                                                     |                   |                   |
|----|-------------------------------------------------------------------------------------|-------------------|-------------------|
| 62 | $MVKAOO + R5O_2 \rightarrow 0.3 * MACR + 0.3 * MVK + 0.6 * MG + HCHO + 1.2 * HO_2$  | $3.0 \times 10^6$ | $3.0 \times 10^6$ |
| 63 | $MVKAOO + R6O_2 \rightarrow 0.3 * MACR + 0.3 * MVK + 0.6 * MG + HCHO + 1.2 * HO_2$  | $3.0 \times 10^6$ | $3.0 \times 10^6$ |
| 64 | $MVKBOO + R1O_2 \rightarrow 0.3 * MACR + 0.3 * MVK + 0.6 * MG + HCHO + 1.2 * HO_2$  | $3.0 \times 10^6$ | $3.0 \times 10^6$ |
| 65 | $MVKBOO + R2O_2 \rightarrow 0.3 * MACR + 0.3 * MVK + 0.6 * MG + HCHO + 1.2 * HO_2$  | $3.0 \times 10^6$ | $3.0 \times 10^6$ |
| 66 | $MVKBOO + R3O_2 \rightarrow 0.3 * MACR + 0.3 * MVK + 0.6 * MG + HCHO + 1.2 * HO_2$  | $3.0 \times 10^6$ | $3.0 \times 10^6$ |
| 67 | $MVKBOO + R4O_2 \rightarrow 0.3 * MACR + 0.3 * MVK + 0.6 * MG + HCHO + 1.2 * HO_2$  | $3.0 \times 10^6$ | $3.0 \times 10^6$ |
| 68 | $MVKBOO + R5O_2 \rightarrow 0.3 * MACR + 0.3 * MVK + 0.6 * MG + HCHO + 1.2 * HO_2$  | $3.0 \times 10^6$ | $3.0 \times 10^6$ |
| 69 | $MVKBOO + R6O_2 \rightarrow 0.3 * MACR + 0.3 * MVK + 0.6 * MG + HCHO + 1.2 * HO_2$  | $3.0 \times 10^6$ | $3.0 \times 10^6$ |
| 70 | $MACRAOO + R1O_2 \rightarrow 0.3 * MACR + 0.3 * MVK + 0.6 * MG + HCHO + 1.2 * HO_2$ | $3.0 \times 10^6$ | $3.0 \times 10^6$ |
| 71 | $MACRAOO + R2O_2 \rightarrow 0.3 * MACR + 0.3 * MVK + 0.6 * MG + HCHO + 1.2 * HO_2$ | $3.0 \times 10^6$ | $3.0 \times 10^6$ |
| 72 | $MACRAOO + R3O_2 \rightarrow 0.3 * MACR + 0.3 * MVK + 0.6 * MG + HCHO + 1.2 * HO_2$ | $3.0 \times 10^6$ | $3.0 \times 10^6$ |
| 73 | $MACRAOO + R4O_2 \rightarrow 0.3 * MACR + 0.3 * MVK + 0.6 * MG + HCHO + 1.2 * HO_2$ | $3.0 \times 10^6$ | $3.0 \times 10^6$ |
| 74 | $MACRAOO + R5O_2 \rightarrow 0.3 * MACR + 0.3 * MVK + 0.6 * MG + HCHO + 1.2 * HO_2$ | $3.0 \times 10^6$ | $3.0 \times 10^6$ |

|    |                                                                                                                                      |                      |                      |
|----|--------------------------------------------------------------------------------------------------------------------------------------|----------------------|----------------------|
| 75 | $\text{MACRAOO} + \text{R6O}_2 \rightarrow 0.3 * \text{MACR} + 0.3 * \text{MVK} + 0.6 * \text{MG} + \text{HCHO} + 1.2 * \text{HO}_2$ | $3.0 \times 10^6$    | $3.0 \times 10^6$    |
| 76 | $\text{MACRBOO} + \text{R1O}_2 \rightarrow 0.3 * \text{MACR} + 0.3 * \text{MVK} + 0.6 * \text{MG} + \text{HCHO} + 1.2 * \text{HO}_2$ | $3.0 \times 10^6$    | $3.0 \times 10^6$    |
| 77 | $\text{MACRBOO} + \text{R2O}_2 \rightarrow 0.3 * \text{MACR} + 0.3 * \text{MVK} + 0.6 * \text{MG} + \text{HCHO} + 1.2 * \text{HO}_2$ | $3.0 \times 10^6$    | $3.0 \times 10^6$    |
| 78 | $\text{MACRBOO} + \text{R3O}_2 \rightarrow 0.3 * \text{MACR} + 0.3 * \text{MVK} + 0.6 * \text{MG} + \text{HCHO} + 1.2 * \text{HO}_2$ | $3.0 \times 10^6$    | $3.0 \times 10^6$    |
| 79 | $\text{MACRBOO} + \text{R4O}_2 \rightarrow 0.3 * \text{MACR} + 0.3 * \text{MVK} + 0.6 * \text{MG} + \text{HCHO} + 1.2 * \text{HO}_2$ | $3.0 \times 10^6$    | $3.0 \times 10^6$    |
| 80 | $\text{MACRBOO} + \text{R5O}_2 \rightarrow 0.3 * \text{MACR} + 0.3 * \text{MVK} + 0.6 * \text{MG} + \text{HCHO} + 1.2 * \text{HO}_2$ | $3.0 \times 10^6$    | $3.0 \times 10^6$    |
| 81 | $\text{MACRBOO} + \text{R6O}_2 \rightarrow 0.3 * \text{MACR} + 0.3 * \text{MVK} + 0.6 * \text{MG} + \text{HCHO} + 1.2 * \text{HO}_2$ | $3.0 \times 10^6$    | $3.0 \times 10^6$    |
| 82 | $\text{R1O}_2 \rightarrow \text{C}_5\text{H}_8\text{O}_2$                                                                            | $3.3 \times 10^5$    | $3.3 \times 10^5$    |
| 83 | $\text{R5O}_2 \rightarrow \text{C}_5\text{H}_8\text{O}_2$                                                                            | $3.3 \times 10^5$    | $3.3 \times 10^5$    |
| 84 | $\text{R1OOH} + \text{OH} \rightarrow \text{C}_5\text{H}_8\text{O}_2 + \text{OH}$                                                    | $6.4 \times 10^9$    | $6.4 \times 10^9$    |
| 85 | $\text{R5OOH} + \text{OH} \rightarrow \text{C}_5\text{H}_8\text{O}_2 + \text{OH}$                                                    | $6.4 \times 10^9$    | $6.4 \times 10^9$    |
| 86 | $\text{R1OOH} \rightarrow \text{C}_5\text{H}_8\text{O}_2 + \text{HO}_2 + \text{OH}$                                                  | $5.8 \times 10^{-6}$ | $5.8 \times 10^{-6}$ |
| 87 | $\text{R5OOH} \rightarrow \text{C}_5\text{H}_8\text{O}_2 + \text{HO}_2 + \text{OH}$                                                  | $5.8 \times 10^{-6}$ | $5.8 \times 10^{-6}$ |



|     |                                                     |                      |                      |
|-----|-----------------------------------------------------|----------------------|----------------------|
| 88  | $C_5H_8O_2 + OH \rightarrow 0.52 * C_5H_9O_5$       | $2.7 \times 10^9$    | $2.7 \times 10^9$    |
| 89  | $C_5H_9O_5 \rightarrow 0.73 * MG + 0.27 * GL$       | $1.3 \times 10^4$    | $1.3 \times 10^4$    |
| 90  | $C_5H_9O_5 + HO_2 \rightarrow C_5H_9O_5H$           | $1.2 \times 10^9$    | $1.2 \times 10^9$    |
| 91  | $C_5H_9O_5H + OH \rightarrow C_5H_9O_5$             | $1.9 \times 10^9$    | $1.9 \times 10^9$    |
| 92  | $C_5H_9O_5H \rightarrow 0.5 * MG + 0.5 * GL$        | $5.8 \times 10^{-6}$ | $5.8 \times 10^{-6}$ |
| 93  | $R1O + O_2 \rightarrow C_5 \text{ carbonyl} + HO_2$ | $1.0 \times 10^5$    | $1.0 \times 10^5$    |
| 94  | $R1O \rightarrow C_5 \text{ carbonyl} + HO_2$       | $1.0 \times 10^5$    | $1.0 \times 10^5$    |
| 95  | $R2O + O_2 \rightarrow MVK + HCHO + HO_2$           | $7.5 \times 10^4$    | $7.5 \times 10^4$    |
| 96  | $R2O \rightarrow MVK + HCHO + HO_2$                 | $7.5 \times 10^4$    | $7.5 \times 10^4$    |
| 97  | $R2O + O_2 \rightarrow HMVK + CH_3O_2$              | $2.5 \times 10^4$    | $2.5 \times 10^4$    |
| 98  | $R2O \rightarrow HMVK + CH_3O_2$                    | $2.5 \times 10^4$    | $2.5 \times 10^4$    |
| 99  | $R3O + O_2 \rightarrow MVK + HCHO + HO_2$           | $5.0 \times 10^4$    | $5.0 \times 10^4$    |
| 100 | $R3O \rightarrow MVK + HCHO + HO_2$                 | $5.0 \times 10^4$    | $5.0 \times 10^4$    |

|     |                                                                                       |                   |                   |
|-----|---------------------------------------------------------------------------------------|-------------------|-------------------|
| 101 | $R3O + O_2 \rightarrow MF + HCHO + HO_2$                                              | $2.5 \times 10^4$ | $2.5 \times 10^4$ |
| 102 | $R3O \rightarrow MF + HCHO + HO_2$                                                    | $2.5 \times 10^4$ | $2.5 \times 10^4$ |
| 103 | $R4O + O_2 \rightarrow MACR + HCHO + HO_2$                                            | $5.0 \times 10^4$ | $5.0 \times 10^4$ |
| 104 | $R4O \rightarrow MACR + HCHO + HO_2$                                                  | $5.0 \times 10^4$ | $5.0 \times 10^4$ |
| 105 | $R4O + O_2 \rightarrow MF + HCHO + HO_2$                                              | $2.5 \times 10^4$ | $2.5 \times 10^4$ |
| 106 | $R4O \rightarrow MF + HCHO + HO_2$                                                    | $2.5 \times 10^4$ | $2.5 \times 10^4$ |
| 107 | $R5O + O_2 \rightarrow C_5 \text{ carbonyl} + HO_2$                                   | $1.0 \times 10^5$ | $1.0 \times 10^5$ |
| 108 | $R5O \rightarrow C_5 \text{ carbonyl} + HO_2$                                         | $1.0 \times 10^5$ | $1.0 \times 10^5$ |
| 109 | $R6O + O_2 \rightarrow MACR + HCHO + HO_2$                                            | $1.0 \times 10^5$ | $1.0 \times 10^5$ |
| 110 | $R6O \rightarrow MACR + HCHO + HO_2$                                                  | $1.0 \times 10^5$ | $1.0 \times 10^5$ |
| 111 | $CH_3O_2 + O_2 \rightarrow HO_2 + HCHO$                                               | $1.0 \times 10^5$ | $1.0 \times 10^5$ |
| 112 | $R1O_2 + CH_3O_2 \rightarrow R1O + CH_3O + O_2$                                       | $6.0 \times 10^7$ | $6.0 \times 10^7$ |
| 113 | $R1O_2 + CH_3O_2 \rightarrow C_5 \text{ alcohol} + C_5 \text{ carbonyl} + HCHO + O_2$ | $6.0 \times 10^7$ | $6.0 \times 10^7$ |

|     |                                                                                                |                      |                      |
|-----|------------------------------------------------------------------------------------------------|----------------------|----------------------|
| 114 | $R2O_2 + CH_3O_2 \rightarrow R2O + CH_3O + O_2$                                                | $6.0 \times 10^7$    | $6.0 \times 10^7$    |
| 115 | $R2O_2 + CH_3O_2 \rightarrow C_5 \text{ alcohol} + C_5 \text{ carbonyl} + HCHO + O_2$          | $6.0 \times 10^7$    | $6.0 \times 10^7$    |
| 116 | $R3O_2 + CH_3O_2 \rightarrow R3O + CH_3O + O_2$                                                | $6.0 \times 10^7$    | $6.0 \times 10^7$    |
| 117 | $R3O_2 + CH_3O_2 \rightarrow C_5 \text{ alcohol} + C_5 \text{ carbonyl} + HCHO + O_2$          | $6.0 \times 10^7$    | $6.0 \times 10^7$    |
| 118 | $R4O_2 + CH_3O_2 \rightarrow R4O + CH_3O + O_2$                                                | $6.0 \times 10^7$    | $6.0 \times 10^7$    |
| 119 | $R4O_2 + CH_3O_2 \rightarrow C_5 \text{ alcohol} + C_5 \text{ carbonyl} + HCHO + O_2$          | $6.0 \times 10^7$    | $6.0 \times 10^7$    |
| 120 | $R5O_2 + CH_3O_2 \rightarrow R5O + CH_3O + O_2$                                                | $6.0 \times 10^7$    | $6.0 \times 10^7$    |
| 121 | $R5O_2 + CH_3O_2 \rightarrow C_5 \text{ alcohol} + C_5 \text{ carbonyl} + HCHO + O_2$          | $6.0 \times 10^7$    | $6.0 \times 10^7$    |
| 122 | $R6O_2 + CH_3O_2 \rightarrow R6O + CH_3O + O_2$                                                | $6.0 \times 10^7$    | $6.0 \times 10^7$    |
| 123 | $R6O_2 + CH_3O_2 \rightarrow C_5 \text{ alcohol} + C_5 \text{ carbonyl} + HCHO + O_2$          | $6.0 \times 10^7$    | $6.0 \times 10^7$    |
| 124 | $CH_3O_2 + CH_3O_2 \rightarrow CH_3O + CH_3O + O_2$                                            | $7.3 \times 10^5$    | $7.3 \times 10^5$    |
| 125 | $CH_3O_2 + CH_3O_2 \rightarrow C_5 \text{ alcohol} + C_5 \text{ carbonyl} + HCHO + O_2$        | $1.5 \times 10^6$    | $1.5 \times 10^6$    |
| 126 | $MACR + \cdot OH \rightarrow 0.5 * CH_2(OH)C \cdot (CH_3)CHO + 0.5 * \cdot CH_2C(OH)(CH_3)CHO$ | $1.3 \times 10^{10}$ | $1.3 \times 10^{10}$ |

|     |                                                                                                                                                                                                                                                                                                                                   |                      |                      |
|-----|-----------------------------------------------------------------------------------------------------------------------------------------------------------------------------------------------------------------------------------------------------------------------------------------------------------------------------------|----------------------|----------------------|
| 127 | $\text{MVK} + \cdot\text{OH} \rightarrow 0.7 * \text{CH}_2(\text{OH})\text{C} \cdot \text{HC}(\text{O})\text{CH}_3 + 0.3 * \text{CH}_2\text{CH}(\text{OH})\text{C}(\text{O})\text{CH}_3$                                                                                                                                          | $1.2 \times 10^{10}$ | $1.2 \times 10^{10}$ |
| 128 | $\text{CH}_2(\text{OH})\text{C} \cdot (\text{CH}_3)\text{CHO} + \text{O}_2 \rightarrow \text{CH}_2(\text{OH})\text{C}(\text{OO}\cdot)(\text{CH}_3)\text{CHO}$                                                                                                                                                                     | $3.2 \times 10^9$    | $3.2 \times 10^9$    |
| 129 | $\cdot\text{CH}_2\text{C}(\text{OH})(\text{CH}_3)\text{CHO} + \text{O}_2 \rightarrow \cdot\text{OOCH}_2\text{C}(\text{OH})(\text{CH}_3)\text{CHO}$                                                                                                                                                                                | $1.8 \times 10^9$    | $1.8 \times 10^9$    |
| 130 | $\text{CH}_2(\text{OH})\text{C} \cdot \text{HC}(\text{O})\text{CH}_3 + \text{O}_2 \rightarrow \text{CH}_2(\text{OH})\text{C}(\text{OO}\cdot)\text{HC}(\text{O})\text{CH}_3$                                                                                                                                                       | $3.2 \times 10^9$    | $3.2 \times 10^9$    |
| 131 | $\cdot\text{CH}_2\text{CH}(\text{OH})\text{C}(\text{O})\text{CH}_3 + \text{O}_2 \rightarrow \cdot\text{OOCH}_2\text{CH}(\text{OH})\text{C}(\text{O})\text{CH}_3$                                                                                                                                                                  | $1.8 \times 10^9$    | $1.8 \times 10^9$    |
| 132 | $2 * \text{CH}_2(\text{OH})\text{C}(\text{OO}\cdot)(\text{CH}_3)\text{CHO} \rightarrow \text{O}_2 + 0.8 * \text{CH}_2(\text{OH})\text{C}(\text{O})\text{CH}_3 + 0.8 * \text{CHO} + \text{CH}_3\text{C}(\text{O})\text{CHO} + \text{CH}_2\text{OH} + 0.2 * \text{CH}_2(\text{OH})\text{C}(\text{O})\text{CHO} + 0.2 * \text{CH}_3$ | $4.0 \times 10^7$    | $4.0 \times 10^7$    |
| 133 | $2 * \text{OOCH}_2\text{C}(\text{OH})(\text{CH}_3)\text{CHO} \rightarrow 2\text{OHCC}(\text{OH})(\text{CH}_3)\text{CHO} + \text{H}_2\text{O}_2$                                                                                                                                                                                   | $2.0 \times 10^8$    | $2.0 \times 10^8$    |
| 134 | $2 * \text{OOCH}_2\text{C}(\text{OH})(\text{CH}_3)\text{CHO} \rightarrow \text{OHCC}(\text{OH})(\text{CH}_3)\text{CHO} + \text{CH}_2(\text{OH})\text{C}(\text{OH})(\text{CH}_3)\text{CHO} + \text{O}_2$                                                                                                                           | $2.0 \times 10^8$    | $2.0 \times 10^8$    |
| 135 | $2 * \text{OOCH}_2\text{C}(\text{OH})(\text{CH}_3)\text{CHO} \rightarrow 2 * \text{HCHO} + 2 * \text{CH}_3\text{C} \cdot (\text{OH})\text{CHO} + \text{O}_2$                                                                                                                                                                      | $4.0 \times 10^7$    | $4.0 \times 10^7$    |
| 136 | $\cdot\text{CHO} + \text{O}_2 \rightarrow \text{CO}_2 + \cdot\text{OH}$                                                                                                                                                                                                                                                           | $4.5 \times 10^9$    | $4.5 \times 10^9$    |
| 137 | $2 * \cdot\text{CHO} \rightarrow \text{HCHO} + \text{HCOOH}$                                                                                                                                                                                                                                                                      | $3.0 \times 10^8$    | $3.0 \times 10^8$    |
| 138 | $\text{CH}_3\text{C} \cdot (\text{OH})\text{CHO} + \text{O}_2 \rightarrow \text{CH}_3\text{C}(\text{OO}\cdot)(\text{OH})\text{CHO}$                                                                                                                                                                                               | $2.0 \times 10^9$    | $2.0 \times 10^9$    |

|     |                                                                                                                                                                                                                                                                             |                   |                   |
|-----|-----------------------------------------------------------------------------------------------------------------------------------------------------------------------------------------------------------------------------------------------------------------------------|-------------------|-------------------|
| 139 | $2 * \text{CH}_3\text{C}(\text{OO}\cdot)(\text{OH})\text{CHO} \rightarrow 0.8 * \text{CH}_3\text{COOH} + 0.8 * \cdot\text{CHO} +$<br>$0.8 * \text{OHCCOOH} + 0.8 * \cdot\text{CH}_3 + 0.2 * \text{CH}_3\text{C}(\text{O})\text{CHO} + 0.2 * \cdot\text{OH}$                 | $1.0 \times 10^8$ | $1.0 \times 10^8$ |
| 140 | $2 * \text{CH}_2(\text{OH})\text{C}(\text{OO}\cdot)\text{HC}(\text{O})\text{CH}_3 \rightarrow 2 * \text{CH}_2(\text{OH})\text{C}(\text{O})\text{C}(\text{O})\text{CH}_3 + \text{H}_2\text{O}_2$                                                                             | $1.0 \times 10^8$ | $1.0 \times 10^8$ |
| 141 | $2 * \text{CH}_2(\text{OH})\text{C}(\text{OO}\cdot)\text{HC}(\text{O})\text{CH}_3 \rightarrow \text{CH}_2(\text{OH})\text{C}(\text{O})\text{C}(\text{O})\text{CH}_3 + \text{CH}_2(\text{OH})\text{CH}(\text{OH})\text{C}(\text{O})\text{CH}_3 + \text{O}_2$                 | $1.0 \times 10^8$ | $1.0 \times 10^8$ |
| 142 | $2 * \text{CH}_2(\text{OH})\text{C}(\text{OO}\cdot)\text{HC}(\text{O})\text{CH}_3 \rightarrow \text{O}_2 + 0.6 * \cdot\text{CH}_2\text{OH} + 0.6 * \text{CH}_3\text{C}(\text{O})\text{CHO} +$<br>$1.4 * \text{CH}_2(\text{OH})\text{CHO} + 1.4 * \text{CH}_3\text{CO}\cdot$ | $8.0 \times 10^7$ | $8.0 \times 10^7$ |
| 143 | $2 * \cdot\text{OOCH}_2\text{CH}(\text{OH})\text{C}(\text{O})\text{CH}_3 \rightarrow 2 * \text{OHCCH}(\text{OH})\text{C}(\text{O})\text{CH}_3 + \text{H}_2\text{O}_2$                                                                                                       | $1.0 \times 10^8$ | $1.0 \times 10^8$ |
| 144 | $2 * \cdot\text{OOCH}_2\text{CH}(\text{OH})\text{C}(\text{O})\text{CH}_3 \rightarrow \text{OHCCH}(\text{OH})\text{C}(\text{O})\text{CH}_3 + \text{CH}_2(\text{OH})\text{CH}(\text{OH})\text{C}(\text{O})\text{CH}_3 + \text{O}_2$                                           | $1.0 \times 10^8$ | $1.0 \times 10^8$ |
| 145 | $2 * \cdot\text{OOCH}_2\text{CH}(\text{OH})\text{C}(\text{O})\text{CH}_3 \rightarrow 2 * \text{HCHO} + 2 * \text{CH}_3\text{C}(\text{O})\text{C}\cdot\text{H}(\text{OH}) + \text{O}_2$                                                                                      | $8.0 \times 10^7$ | $8.0 \times 10^7$ |
| 146 | $\text{CH}_3\text{CO}\cdot + \text{O}_2 \rightarrow \text{CH}_3\text{CO}_3\cdot$                                                                                                                                                                                            | $5.0 \times 10^9$ | $5.0 \times 10^9$ |
| 147 | $2 * \text{CH}_3\text{CO}_3\cdot \rightarrow \text{O}_2 + 2\text{CO}_2 + 2 \cdot\text{CH}_3$                                                                                                                                                                                | $1.0 \times 10^7$ | $1.0 \times 10^7$ |
| 148 | $\text{CH}_3\text{CO}\cdot + \cdot\text{OH} \rightarrow \text{CH}_3\text{COOH}$                                                                                                                                                                                             | $1.0 \times 10^9$ | $1.0 \times 10^9$ |
| 149 | $2 * \text{CH}_3\text{CO}\cdot \rightarrow \text{CH}_3\text{COCOCH}_3$                                                                                                                                                                                                      | $1.0 \times 10^9$ | $1.0 \times 10^9$ |
| 150 | $\text{CH}_3\text{CO}_3\cdot + \text{CH}_3\text{O}_2\cdot \rightarrow \text{O}_2 + \text{HCHO} + \text{CH}_3\text{COOH}$                                                                                                                                                    | $1.7 \times 10^8$ | $1.7 \times 10^8$ |

|     |                                                                                                                                                       |                                  |                                  |
|-----|-------------------------------------------------------------------------------------------------------------------------------------------------------|----------------------------------|----------------------------------|
| 151 | $\text{CH}_2(\text{OH})\text{CHO} + \cdot\text{OH} \rightarrow \text{CH}_2(\text{OH})\text{COOH} + \text{HO}_2 \cdot + \text{H}_2\text{O}$            | $5.0 \times 10^8$                | $5.0 \times 10^8$                |
| 152 | $\text{CH}_2(\text{OH})\text{COOH} + \cdot\text{OH} \rightarrow \cdot\text{CH}(\text{OH})\text{COOH} + \text{H}_2\text{O}$                            | $5.4 \times 10^8$                | $5.4 \times 10^8$                |
| 153 | $\cdot\text{CH}(\text{OH})\text{COOH} + \text{O}_2 \rightarrow \cdot\text{OOCH}(\text{OH})\text{COOH}$                                                | $2.0 \times 10^9$                | $2.0 \times 10^9$                |
| 154 | $\cdot\text{OOCH}(\text{OH})\text{COOH} + \text{H}_2\text{O} \rightarrow \text{CH}(\text{OH})_2\text{COOH} + \text{HO}_2 \cdot$                       | 52                               | 52                               |
| 155 | $\text{CH}(\text{OH})_2\text{COOH} + \cdot\text{OH} \rightarrow \text{HOCCOOH} + \text{HO}_2 \cdot + \text{H}_2\text{O}$                              | $3.6 \times 10^8$                | $3.6 \times 10^8$                |
| 156 | $\text{CH}_2(\text{OH})\text{CHO} + \cdot\text{OH} \rightarrow (\text{OH})_2\text{CHCH}(\text{OH})_2 + \text{HO}_2 \cdot$                             | $1.0 \times 10^9$                | $1.0 \times 10^9$                |
| 157 | $\text{CH}(\text{OH})_2\text{COOH} + \text{H}_2\text{O}_2 \rightarrow \text{HCOOH} + \text{CO}_2 + \text{H}_2\text{O}$                                | 0.3                              | 0.3                              |
| 158 | $(\text{OH})_2\text{CHCH}(\text{OH})_2 + \cdot\text{OH} \rightarrow \text{CHOCO}(\text{OH})_2 + \text{HO}_2 \cdot$                                    | $1.1 \times 10^9$                | $1.1 \times 10^9$                |
| 159 | $\text{CH}_3\text{C}(\text{O})\text{CH}(\text{OH})\cdot + \text{O}_2 \rightarrow \text{CH}_3\text{C}(\text{O})\text{CH}(\text{OH})\text{OO}\cdot$     | $2.0 \times 10^9$                | $2.0 \times 10^9$                |
| 160 | $\text{CH}_3\text{C}(\text{O})\text{CH}(\text{OH})\text{OO}\cdot \rightarrow \text{CH}_3\text{C}(\text{O})\text{CHO} + \text{HO}_2$                   | $2.1 \times 10^2$                | $2.1 \times 10^2$                |
| 161 | $2 * \text{CH}_3\text{C}(\text{O})\text{CH}(\text{OH})\text{OO}\cdot \rightarrow 2 * \text{CH}_3\text{C}(\text{O})\text{COOH} + \text{H}_2\text{O}_2$ | $3.5 \times 10^8$                | $3.5 \times 10^8$                |
| 162 | $\text{CHOCO}(\text{OH})_2 + \cdot\text{OH} \rightarrow \text{HOCCOOH} + \text{HO}_2 \cdot + \text{H}_2\text{O}$                                      | $1.2 \times 10^9$                | $1.2 \times 10^9$                |
| 163 | $\text{HCHO} + \text{H}_2\text{O} \rightarrow \text{CH}_2(\text{OH})_2$                                                                               | 0.18 (F)<br>$5.1 \times 10^{-3}$ | 0.18 (F)<br>$5.1 \times 10^{-3}$ |

|     |                                                                                                                                                             |                      |                      |
|-----|-------------------------------------------------------------------------------------------------------------------------------------------------------------|----------------------|----------------------|
| 164 | $\text{CH}_2(\text{OH})_2 + \cdot\text{OH} \rightarrow \text{H}_2\text{O} + \text{HO}_2 \cdot + \text{HCOOH}$                                               | (B)                  | (B)                  |
|     |                                                                                                                                                             | $1.0 \times 10^9$    | $1.0 \times 10^9$    |
|     |                                                                                                                                                             | $8.9 \times 10^6$    | $8.9 \times 10^6$    |
| 165 | $\text{HCOOH} \leftrightarrow \text{HCOO}^- + \text{H}^+$                                                                                                   | (F)                  | (F)                  |
|     |                                                                                                                                                             | $5.0 \times 10^{10}$ | $5.0 \times 10^{10}$ |
|     |                                                                                                                                                             | (B)                  | (B)                  |
| 166 | $\text{HCOOH} + \cdot\text{OH} \rightarrow \text{H}_2\text{O} + \text{HO}_2 \cdot + \text{CO}_2$                                                            | $1.3 \times 10^8$    | $1.3 \times 10^8$    |
| 167 | $\text{HCOO}^- + \cdot\text{OH} \rightarrow \text{OH}^- + \text{HO}_2 \cdot + \text{CO}_2$                                                                  | $4.0 \times 10^9$    | $4.0 \times 10^9$    |
| 168 | $\text{CH}_3\text{C}(\text{O})\text{CHO} + \text{H}_2\text{O} \leftrightarrow \text{CH}_3\text{C}(\text{O})\text{CH}(\text{OH})_2$                          | 21.5 (F)             | 21.5 (F)             |
|     |                                                                                                                                                             | 0.5 (B)              | 0.5 (B)              |
| 169 | $\text{CH}_3\text{C}(\text{O})\text{CH}(\text{OH})_2 + \text{OH} \rightarrow \text{CH}_3\text{C}(\text{O})\text{C}(\text{OH})_2 \cdot + \text{H}_2\text{O}$ | $1.1 \times 10^9$    | $1.1 \times 10^9$    |
| 170 | $\text{CH}_3\text{C}(\text{O})\text{C}(\text{OH})_2 \cdot + \text{O}_2 \rightarrow \text{CH}_3\text{C}(\text{O})\text{C}(\text{OH})_2 \text{OO} \cdot$      | $2.0 \times 10^9$    | $2.0 \times 10^9$    |
| 171 | $\text{CH}_3\text{C}(\text{O})\text{C}(\text{OH})_2 \text{OO} \cdot \rightarrow \text{CH}_3\text{C}(\text{O})\text{COOH} + \text{HO}_2 \cdot$               | $1.0 \times 10^7$    | $1.0 \times 10^7$    |
|     |                                                                                                                                                             | $1.8 \times 10^8$    | $1.8 \times 10^8$    |
| 172 | $\text{CH}_3\text{C}(\text{O})\text{COOH} \leftrightarrow \text{CH}_2\text{C}(\text{O})\text{COO}^- + \text{H}^+$                                           | (F)                  | (F)                  |
|     |                                                                                                                                                             | $5.0 \times 10^{10}$ | $5.0 \times 10^{10}$ |
|     |                                                                                                                                                             | (B)                  | (B)                  |
| 173 | $\text{CH}_3\text{C}(\text{O})\text{COO}^- + h\nu \leftrightarrow \text{CH}_3\text{COO}^-$                                                                  | $5.0 \times 10^{-4}$ | $5.0 \times 10^{-4}$ |
|     |                                                                                                                                                             | (s <sup>-1</sup> )   | (s <sup>-1</sup> )   |

|     |                                                                                                                                               |                                                         |                                                         |
|-----|-----------------------------------------------------------------------------------------------------------------------------------------------|---------------------------------------------------------|---------------------------------------------------------|
| 174 | $\text{CH}_3\text{C}(\text{O})\text{COO}^- + \text{H}_2\text{O}_2 \leftrightarrow \text{CH}_3\text{COO}^- + \text{H}_2\text{O} + \text{CO}_2$ | 0.11                                                    | 0.11                                                    |
| 175 | $\text{CH}_3\text{C}(\text{O})\text{COOH} + \cdot\text{OH} \rightarrow \cdot\text{CH}_2\text{C}(\text{O})\text{COOH} + \text{H}_2\text{O}$    | $1.2 \times 10^8$                                       | $1.2 \times 10^8$                                       |
| 176 | $\cdot\text{CH}_2\text{C}(\text{O})\text{COOH} + \text{O}_2 \rightarrow \cdot\text{O}_2\text{CH}_2\text{C}(\text{O})\text{COOH}$              | $1.9 \times 10^7$                                       | $1.9 \times 10^7$                                       |
| 177 | $2 \cdot \cdot\text{O}_2\text{CH}_2\text{C}(\text{O})\text{COOH} \rightarrow 2 \cdot \text{OHCC}(\text{O})\text{COOH} + \text{H}_2\text{O}_2$ | $2.0 \times 10^7$                                       | $2.0 \times 10^7$                                       |
| 178 | $\text{CH}_3\text{COOH} \leftrightarrow \text{CH}_3\text{COO}^- + \text{H}^+$                                                                 | $8.8 \times 10^5$<br>(F)<br>$5.0 \times 10^{10}$<br>(B) | $8.8 \times 10^5$<br>(F)<br>$5.0 \times 10^{10}$<br>(B) |
| 179 | $\text{CH}_3\text{COOH} + \cdot\text{OH} \leftrightarrow \text{HOCCOOH}$                                                                      | $1.6 \times 10^7$                                       | $1.6 \times 10^7$                                       |
| 180 | $\text{CH}_3\text{COO}^- + \cdot\text{OH} \rightarrow \text{HOCCOO}^-$                                                                        | $8.5 \times 10^7$                                       | $8.5 \times 10^7$                                       |
| 181 | $\text{HOCCOOH} + \cdot\text{OH} \rightarrow 2 \cdot \text{CO}_2 + \text{H}_2\text{O} + \text{HO}_2 \cdot$                                    | $1.4 \times 10^6$                                       | $1.4 \times 10^6$                                       |
| 182 | $\text{HOCCOO}^- + \cdot\text{OH} \rightarrow 2 \cdot \text{CO}_2 + \text{H}_2\text{O} + \text{O}_2^- \cdot$                                  | $4.7 \times 10^7$                                       | $4.7 \times 10^7$                                       |
| 183 | $\text{HOCCOOH} \leftrightarrow \text{HOCCOO}^- + \text{H}^+$                                                                                 | $3.2 \times 10^9$<br>(F)<br>$5.0 \times 10^{10}$<br>(B) | $3.2 \times 10^9$<br>(F)<br>$5.0 \times 10^{10}$<br>(B) |
| 184 | $\text{CH}_3 \cdot + \text{O}_2 \rightarrow \text{CH}_3\text{O}_2 \cdot$                                                                      | $4.1 \times 10^9$                                       | $4.1 \times 10^9$                                       |



|     |                                                                                                                       |                   |                   |
|-----|-----------------------------------------------------------------------------------------------------------------------|-------------------|-------------------|
| 185 | $\text{CH}_3\text{O}_2\cdot + \text{CH}_3\text{O}_2\cdot \rightarrow \text{CH}_3\text{OH} + \text{HCHO} + \text{O}_2$ | $1.7 \times 10^8$ | $1.7 \times 10^8$ |
| 186 | $\cdot\text{CH}_2\text{OH} + \text{O}_2 \rightarrow \cdot\text{OOCH}_2\text{OH}$                                      | $2.0 \times 10^9$ | $2.0 \times 10^9$ |
| 187 | $2 \cdot \cdot\text{OOCH}_2\text{OH} \rightarrow \text{CH}_3\text{OH} + \text{HCHO} + \text{O}_2$                     | $1.1 \times 10^9$ | $1.1 \times 10^9$ |

The formula or description of the simplified name in Table.1 are as follows:

| Name             | Formula/description                                                                | Name                                         | Formula/description                                                                                                                   |
|------------------|------------------------------------------------------------------------------------|----------------------------------------------|---------------------------------------------------------------------------------------------------------------------------------------|
| R1O <sub>2</sub> | $\text{HOCH}_2\text{C}(\text{CH}_3) = \text{CHCH}_2\text{OO}\cdot$                 | R5O                                          | $\cdot\text{OCH}_2\text{C}(\text{CH}_3) = \text{CHCH}_2\text{OH}$                                                                     |
| R2O <sub>2</sub> | $\text{HOCH}_2\text{C}(\text{CH}_3)(\text{OO}\cdot)\text{CH} = \text{CH}_2$        | R6O                                          | $\text{CH}_2 = \text{C}(\text{CH}_3)\text{CH}(\text{O}\cdot)\text{CH}_2\text{OH}$                                                     |
| R3O <sub>2</sub> | $\text{CH}_2 = \text{CHC}(\text{CH}_3)(\text{OH})\text{CH}_2\text{OO}\cdot$        | MACAOO                                       | $\text{CH}_2(\text{OH})\text{C}(\text{OO}\cdot)(\text{CH}_3)\text{CHO}$                                                               |
| R4O <sub>2</sub> | $\text{CH}_2 = \text{C}(\text{CH}_3)\text{CH}(\text{OH})\text{CH}_2\text{OO}\cdot$ | MACBOO                                       | $\cdot\text{OOCH}_2\text{C}(\text{OH})(\text{CH}_3)\text{CHO}$                                                                        |
| R5O <sub>2</sub> | $\cdot\text{OOCH}_2\text{C}(\text{CH}_3) = \text{CHCH}_2\text{OH}$                 | MVKAOO                                       | $\text{CH}_2(\text{OH})\text{C}(\text{OO}\cdot)\text{HC}(\text{O})\text{CH}_3$                                                        |
| R6O <sub>2</sub> | $\text{CH}_2 = \text{C}(\text{CH}_3)\text{CH}(\text{OO}\cdot)\text{CH}_2\text{OH}$ | MVKBOO                                       | $\cdot\text{OOCH}_2\text{CH}(\text{OH})\text{C}(\text{O})\text{CH}_3$                                                                 |
| R1O              | $\text{HOCH}_2\text{C}(\text{CH}_3) = \text{CHCH}_2\text{O}\cdot$                  | HMVK                                         | $\text{CH}_2(\text{OH})\text{C}\cdot\text{HC}(\text{O})\text{CH}_3$<br>$\text{CH}_2\text{CH}(\text{OH})\text{C}(\text{O})\text{CH}_3$ |
| R2O              | $\text{HOCH}_2\text{C}(\text{CH}_3)(\text{O}\cdot)\text{CH} = \text{CH}_2$         | C <sub>5</sub> H <sub>8</sub> O <sub>2</sub> | Carbonyls (internal double bond)                                                                                                      |

|     |                                                                                   |                                          |                                                      |
|-----|-----------------------------------------------------------------------------------|------------------------------------------|------------------------------------------------------|
| R3O | $\text{CH}_2 = \text{CHC}(\text{CH}_3)(\text{OH})\text{CH}_2\text{O}\cdot$        | $\text{C}_5\text{H}_9\text{O}_5$         | Peroxy radicals from $\text{C}_5$ -hydroxy aldehydes |
| R4O | $\text{CH}_2 = \text{C}(\text{CH}_3)\text{CH}(\text{OH})\text{CH}_2\text{O}\cdot$ | $\text{C}_5\text{H}_9\text{O}_5\text{H}$ | Hydroperoxides from $\text{C}_5\text{H}_9\text{O}_5$ |

### References:

Bell, R. P. and Evans, P. G.: Kinetics of the dehydration of methylene glycol in aqueous solution, Proc. R. Soc., 291, 297 – 323, 1966.

Betterton, E. A. and Hoffmann, M. R.: Henry's law constants of some environmentally important aldehydes, Environ. Sci. Technol., 22, 1415 – 1418, 1988.

Bothe, E., Schuchmann, M. N., Schulte-Frohlinde, D., and von Sonntag, C.: HO<sub>2</sub> elimination from α-hydroxalkyl-peroxyl radicals in aqueous solution. Photochem. Photobiol., 28, 639 – 644, 1978.

Buxton, G. V., Greenstock, C. L., Helman, W. P., and Ross, A. B.: Critical review of rate constants for reactions of hydrated electrons, hydrogen atoms and hydroxyl radicals, (OH, O<sup>-2</sup>) in aqueous solution, J. Phys. Chem. Ref. Data 17, 513 – 886, 1988.

Carlton, A. G., Lim, H. J., Altieri, K., Seitinger, S., and Turpin, B. J.: Link between isoprene and secondary organic aerosol (SOA): pyruvic acid oxidation yields low volatility organic acids in clouds, Geophys. Res. Lett., 33, L06822, doi: 10.1029/2005GL025374, 2006.

- Chin, M. and Wine, P. H.: A temperature-dependent competitive kinetics study of the aqueous phase reactions of OH radicals with formate, formic acid, acetate, acetic acid and hydrated formaldehyde, *Aquatic and Surface Photochem.*, Lewis Publishers, Boca Raton, 1994.
- Ervens, B., Gligorovski, S., and Herrmann, H.: Temperature-dependent rate constants for hydroxyl radical reactions with organic compounds in aqueous solutions, *Phys. Chem. Chem. Phys.*, 5, 1811 – 1824, 2003.
- Gligorovski, S. and Herrmann, H.: Kinetics of reactions of OH with organic carbonyl compounds in aqueous solution, *Phys. Chem. Chem. Phys.*, 6, 4118 – 4126, 2009.
- Glowa, G., Driver, P., and Wren, J. C.: Irradiation of MEK-II: A detailed kinetic model for the degradation under of 2-butanone in aerated aqueous solutions steady-state gamma-radiolysis conditions, *Radiation Phys. Chem.*, 58, 49 – 68, 2000.
- Graedel, T. E. and Weschler, C. J.: Chemistry within aqueous atmospheric aerosols and raindrops, *Rev. Geophys. Space Phys.*, 19, 505 – 539, 1981.
- Harned, H. S. and Owen, B. B.: *The physical chemistry of electrolytic solutions*, Reinhold, New York, 1958.
- Hart, E. J., Thomas, J. K., and Gordon, S.: A review of the radiation chemistry of single-carbon compounds and some reactions of the hydrated electron in aqueous solution, *Radiat. Res. Suppl.* 4, 74 – 88, 1964.

- Herrmann, H., Ervens, B., Jacob, H. W., Wolke, R., Nowacki, P., and Zellner, R.: CAPRAM2.3: A chemical aqueous phase radical mechanism for tropospheric chemistry, *J. Atmos. Chem.*, 36, 231 – 330, 2000.
- Herrmann, H., Reese, A., Ervens, B., Wicktor, F., and Zellner, R.: Laboratory and modeling studies of tropospheric multiphase conversions involving some C1 and C2 peroxy radicals, *Phys. Chem. Earth* 24, 287 – 290, 1999.
- Herrmann, H., Tilgner, A., Barzagli, P., Majdik, Z., Gligorovski, S., Poulain, L., and Monod, A.: Towards a more detailed description of tropospheric aqueous phase organic chemistry: CAPRAM 3.0, *Atmos. Environ.*, 39, 4351 – 4363, 2005.
- Jenkin, M. E. and Hayman, G. D.: Kinetics of reactions of primary, secondary and tertiary  $\beta$ -hydroxy peroxy radicals, *J. Chem. Soc. Faraday Trans.*, 91(13), 1911-1922, 1995.
- Jenkin, M. E., Boyd, A. A., and Lesclaux, R.: Peroxy radical kinetics resulting from the OH-initiated oxidation of 1,3-butadiene, 2,3-dimethyl-1,3-butadiene and isoprene, *J. Atmos. Chem.*, 29, 267–298, 1998.
- Liao, C. H. and Gurol, M. D.: Chemical oxidation by photolytic decomposition of hydrogen peroxide, *Environ. Sci. Technol.*, 29, 3007 – 3014, 1995.

- Lim, H. J., Carlton, A. G., and Turpin, B. J.: Isoprene forms secondary organic aerosol through cloud processing: model simulations, *Environ. Sci. Technol.*, 39, 4441 – 4446, 2005.
- Marchaj, A., Kelley, D. G., Bakac, A., and Espenson, J. H.: Kinetics of the reactions between alkyl radicals and molecular oxygen in aqueous solution, *J. Phys. Chem.*, 95, 4440 – 4441, 1991.
- Meyerstein, D.: Trivalent Copper I — A pulse radiolytic study of the properties of the aquocomplex, *Inorg. Chem.*, 10, 638 – 41, 1971.
- Neta, P., Huie, R. E., and Ross, A. B.: Rate constants for reactions of peroxy radicals in fluid solutions, *J. Phys. Chem. Ref. Data.*, 19, 413–513, 1990.
- Scholes, G. and Willson, R. L.:  $\gamma$ -Radiolysis of aqueous thymine solutions: determination of relative reaction rates of OH radicals, *Trans. Faraday Soc.*, 63, 2983 – 2994, 1967.
- Stefan, M. I. and Bolton, J. R.: Reinvestigation of the acetone degradation mechanism in dilute aqueous solution by the UV/H<sub>2</sub>O<sub>2</sub> process, *Environ. Sci. Technol.*, 33, 870 – 873, 1999.
- Stefan, M. I., Hoy, A. R., and Bolton, J. R.: Kinetics and mechanism of the degradation and mineralization of acetone in dilute aqueous solution sensitized by the UV photolysis of hydrogen peroxide, *Environ. Sci. Technol.*, 30, 2382 – 2390, 1996.

- Tan, Y., Perri, M. J., Seitzinger, S. P., and Turpin, B. J.: Effects of precursor concentration and acidic sulfate in aqueous glyoxal-OH radical oxidation and implications for secondary organic aerosol, *Environ. Sci. Technol.*, 43, 8105 – 8112, 2009.
- Taraborrelli, D., Lawrence, M. G., Butler, T. M., Sander, R., and Lelieveld, J.: Mainz isoprene mechanism 2 (MIM2): An isoprene oxidation mechanism for regional and global atmospheric modelling, *Atmos. Chem. Phys.*, 9, 2751–2777, 2009.
- von Sonntag, C.: *The chemical basis of radiation biology*, Taylor & Francis, 1987.
- Warneck, P.: In-cloud chemistry opens pathway to the formation of oxalic acid in the marine atmosphere, *Atmos. Environ.*, 37, 2423 – 2427, 2003.
- Warneck, P.: The relative importance of various pathways for the oxidation of sulphur dioxide and nitrogen dioxide in sunlit continental fair weather clouds, *Phys. Chem. Chem. Phys.*, 1, 5471 – 5483, 1999.
- Zimmermann, J., Poppe, D.: a supplement for the RADM2 chemical mechanism: the photooxidation of isoprene, *Atmos. Environ.*, 8, 30, 1255–1269, 1996.

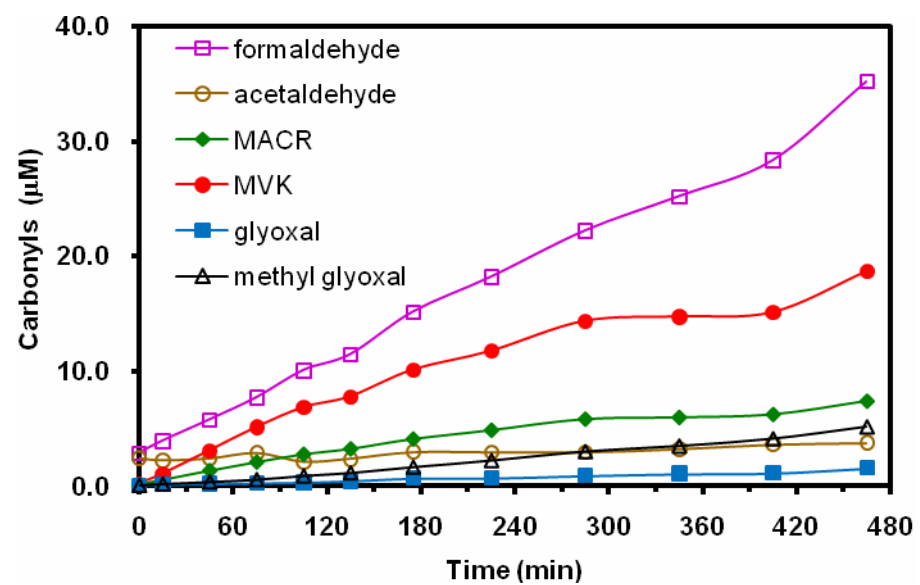

**Fig.S1.** The time series of products in the aqueous isoprene-OH reaction under the condition of 1.5 L top space in the 2.1 L reactor.

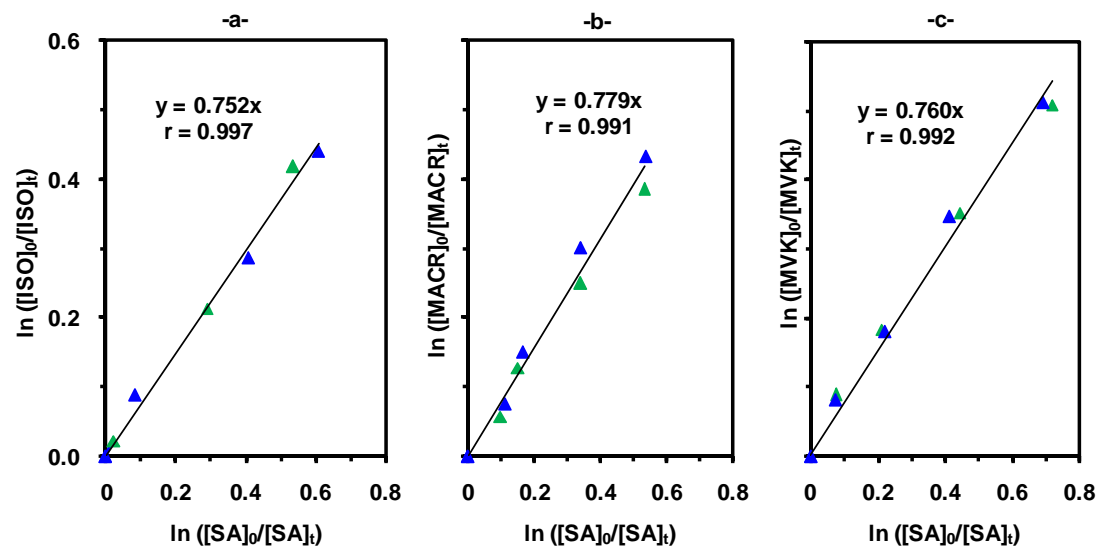

**Fig.S2.** Experiments 1 and 2 (green and blue) for the kinetics of aqueous OH-initiated oxidation of isoprene (ISO), methacrolein (MACR), and methyl vinyl ketone (MVK) relative to salicylic acid at 283 K. (a) ISO/SA; (b) MACR/SA; (c) MVK/SA.
